# Supplementary material for: Tumor loci and their interactions on mouse chromosome 19 that contribute to testicular germ cell tumors
Source: PubMed Central journal article supplement (PMC4053281; doi:10.1186/1471-2156-15-65), 2014-05-30

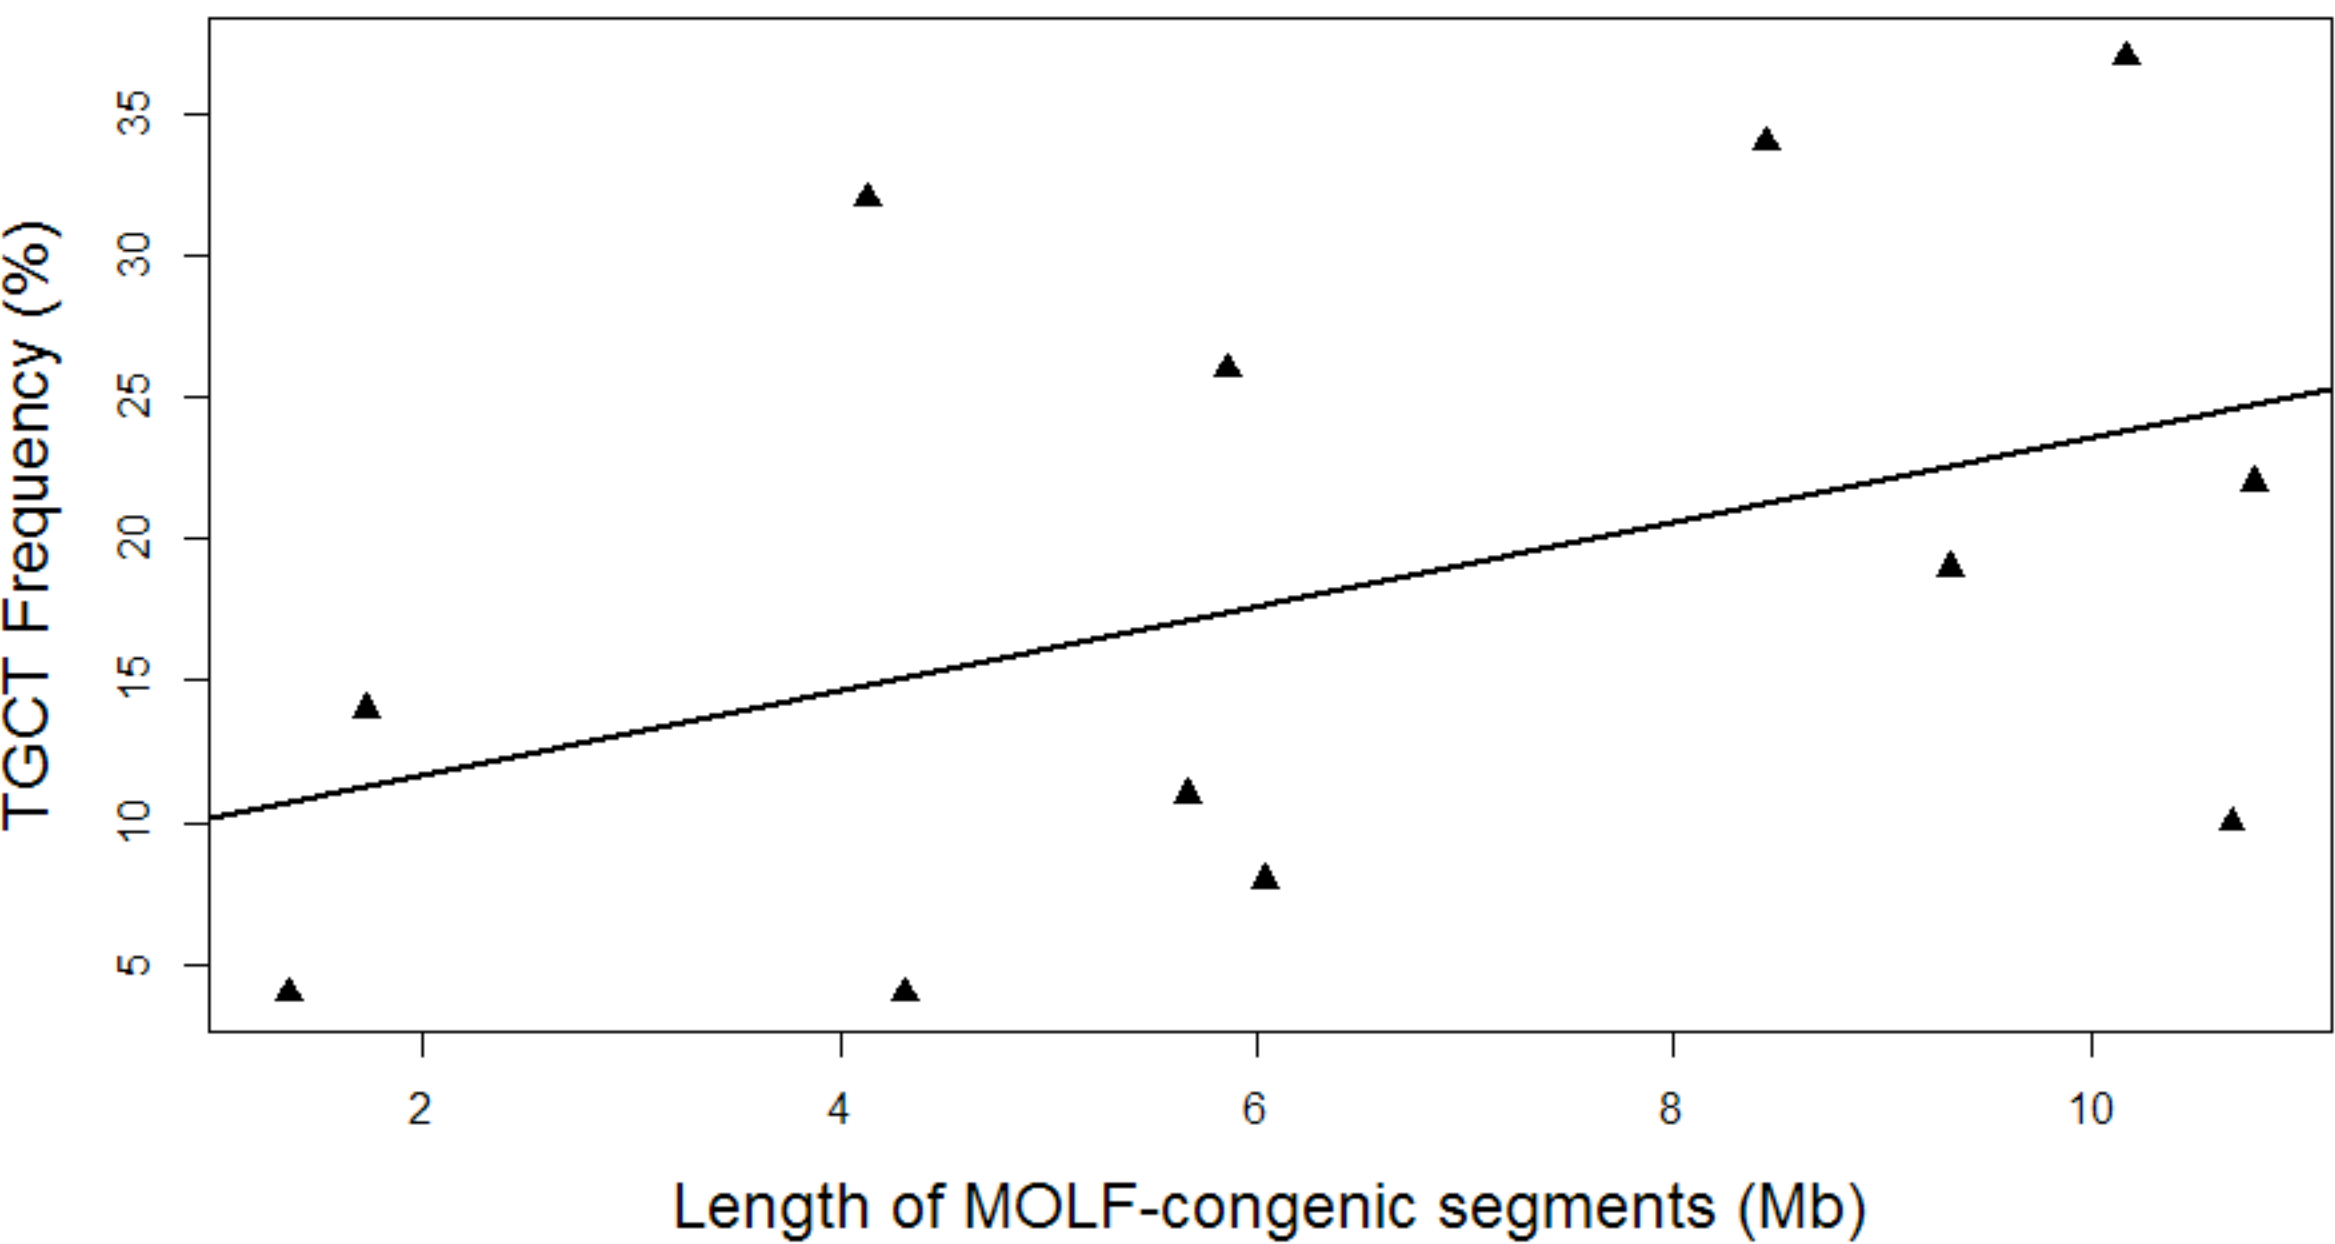

Supplement: 1471-2156-15-65-S4.pdf [file 1471-2156-15-65-S4.pdf]
